# Supplementary material for: Melatonin for the prevention of postoperative delirium in older adults: a protocol for a systematic review and meta-analysis
Source: HighWire-hosted journal article supplement (doi:10.1136/bmjopen-2022-063405), 2022-09-01
Supplement: bmjopen-2022-063405supp001_data_supplement.pdf [file bmjopen-2022-063405supp001_data_supplement.pdf]

## Search Strategy

[melatonin(MH) OR ramelteon(TW) OR rozerem(TW) OR “melatonin agonist\*”(TW) OR “N-Acetyl-5-methoxytryptamine”(TW) OR melatonin\*(TW) OR Melatoniin\*(TW) OR circadin(TW) OR “HT 903”(TW) OR melapure(TW) OR armonia(TW) OR melamil(TW) OR benedorm(TW) OR “BP 2013”(TW) OR BP2013 OR JL5DK93RCL(TW)]

AND

[delirium(MH) OR “emergence delirium”(MH), OR delirium(TW) OR “perioperative delirium”(TW) OR “postoperative delirium”(TW) OR “organic brain syndrome”(TW) OR “acute confusion”(TW)]

Dates: 1<sup>st</sup> January 1990 – 28<sup>th</sup> February 2022

Other limits: Nil
